# Supplementary material for: Risperidone-Associated Hypocalcemia
Source: Atypon-hosted journal article supplement (doi:10.1176/appi.ajp.2010.10071003), 2010-12-01
Supplement: ajp_167_12_1533_01.pdf [file ajp_167_12_1533_01.pdf]

SUPPLEMENTAL DATA

RISPERIDONE-ASSOCIATED HYPOCALCEMIA

Letter to the Editor – for publication

Dragan R. Milovanovic, M.D., Ph.D.<sup>1</sup> Vladimir Janjic, M.D., M.Sc.<sup>2</sup> Nenad Zornic, M.D., M.Sc.<sup>1</sup> Slavica Djukic Dejanovic, M.D., Ph.D.,<sup>2</sup> and Slobodan M. Jankovic M.D., Ph.D.<sup>1</sup>

<sup>1</sup>Department of Clinical Pharmacology, <sup>2</sup>Psychiatry Clinic, Medical Faculty and Clinical Centre, Kragujevac, Serbia

Correspondence:  
Prof. Dragan R. Milovanovic, MD, PhD  
Department of Clinical Pharmacology  
Medical Faculty and Clinical Centre  
Svetozara Markovica 69, PO Box 124  
34000 Kragujevac, Serbia  
Tel: 00381 34 335 572  
Fax: 00381 34 306 800  
E-mail: piki@ptt.rs

SUPPLEMENTAL TABLE 1. Demographic and other clinical characteristics of the study sample derived from medical files of Psychiatry Clinic of Clinical Centre “Kragujevac”, Kragujevac, Serbia, encompassing the period from January 2004 to September 2009 year.

| Variable                                  | Value <sup>a</sup>                              |
|-------------------------------------------|-------------------------------------------------|
| Total patients                            | 1245 (100)                                      |
| Males                                     | 770 (61.8)                                      |
| Females                                   | 475 (38.2)                                      |
| Age                                       | 45.5±13.3 years (44.7-46.4, 18-80) <sup>b</sup> |
| Serum calcium in risperidone users        |                                                 |
| Hypocalcemic                              | 2.04±0.04 mmol/L <sup>c</sup>                   |
| Normocalcemic                             | 2.27±0.11 mmol/L                                |
| Drug treatment <sup>d</sup>               |                                                 |
| Benzodiazepines                           | 1214 (92.0)                                     |
| Typical antipsychotics                    | 613 (46.4)                                      |
| Selective serotonin reuptake inhibitors   | 207 (15.7)                                      |
| Mood stabilizers                          | 204 (15.5)                                      |
| Selective hypnotics                       | 127 (9.6)                                       |
| Atypical antipsychotics <sup>e</sup>      | 89 (6.7)                                        |
| Tricyclic or heterocyclic antidepressants | 86 (6.5)                                        |
| Angiotensin-converting enzyme inhibitors  | 68 (5.2)                                        |
| Beta-blockers                             | 67 (5.1)                                        |
| Atypical antidepressants                  | 59 (4.5)                                        |
| Hormones and vitamins                     | 46 (3.5)                                        |
| Non-steroidal anti-inflammatory agents    | 41 (3.1)                                        |
| Antiulcers                                | 32 (2.4)                                        |
| Nitrates                                  | 31 (2.3)                                        |
| Neurological drugs                        | 23 (1.7)                                        |
| Inotropics                                | 20 (1.5)                                        |
| Calcium channel blockers                  | 18 (1.4)                                        |
| Antiinfectives                            | 14 (1.1)                                        |
| Antiasthmatics                            | 12 (0.9)                                        |
| Digestives                                | 11 (0.8)                                        |
| Diuretics <sup>f</sup>                    | 6 (0.5)                                         |

<sup>a</sup>Represent absolute numbers (percentage) and values in denoted units.

<sup>b</sup>The mean age ± standard deviation (95% confidence interval, range).

<sup>c</sup>Student's test,  $t=-13.8$ ,  $df=326$ ,  $p<0.001$ .

<sup>d</sup>From the total of 1320 record sets (100%); no drugs, except calcium channel blockers as a group, was significantly associated with hypocalcemia.

<sup>e</sup>Other than risperidone.

<sup>f</sup>Small doses as antihypertensives.

## SUPPLEMENTAL INFORMATION 1. Adjusting for confounders.

The confounders included in multivariable logistic regression were: age, gender, drugs (prescribed in the hospital) and data sets (time period of serum sample analysis). Other risk factors for hypocalcemia and osteoporosis have been looked at, according to a literature reminder.<sup>1,2</sup> However, they have not been included as confounders due to missed data (not routinely performed in the Psychiatry Clinic of our hospital), inappropriately described or ignored in medical files or available only for minority of study subjects. They were as follows: nutritional status (slender, anorectic, malabsorption), poor habits (smoking, alcoholic), musculoskeletal status (prolonged rest, family history of osteoporosis, past low-trauma fractures), endocrine and gonadal status (thyrotoxicosis, pseudo/hypoparathyroidism, hyperparathyroidism, Cushing's syndrome, hyperprolactinemia, early menopause, amenorrhea), previous drug use (corticosteroids, aluminum containing antacids, rifampicin, orlistat, glucocorticoids, bisphosphonates), calcium homeostasis parameters (parathyroid hormone, vitamin D, calcitonin, thyroxine, magnesium, phosphate, alkaline phosphatase, serum albumin) and other conditions (chronic renal failure, primary biliary cirrhosis, rheumatoid arthritis, myeloma, mastocytosis, overhydration, osteomalacia). Acute conditions like pancreatitis, acid-base disorders and rhabdomyolysis were exclusion criteria. More than 80% study subjects was active, medium-to-heavy smokers.

1. Longmore M, Wilkinson IB, Turmezei T, Kay Cheung C. Oxford handbook of clinical medicine. 7<sup>th</sup> ed. Oxford: Oxford University Press, 2007.
2. Lourenço R. Drug-induced fluid and electrolyte disorders. *EJHP Practice* 2008; 14(3): 43-6.

## LEGEND FOR SUPPLEMENTAL FIGURE

SUPPLEMENTAL FIGURE 1. The study flow diagram.
