# Supplementary material for: Risperidone-Associated Hypocalcemia
Source: Atypon-hosted journal article supplement (doi:10.1176/appi.ajp.2010.10071003), 2010-12-01
Supplement: ajp_167_12_1533_02.pdf [file ajp_167_12_1533_02.pdf]

Assessed for eligibility (n=1406)

Excluded (n=76)

- data inaccuracy (n=43)
- presence of obvious cause of electrolyte disturbances (n=24)
- outside 18-80 years (n=9)

Analysis

Analysed (n=1320)

- Excluded from analysis (outside 99 percentile) (n=10)
